# Supplementary material for: Drug -driven self-assembly of pH-sensitive nano-vesicles with high loading capacity and anti-tumor efficacy
Source: Royal Society of Chemistry journal article supplement (doi:10.1039/d0bm01987a), 2021-01-01
Supplement: d0bm01987a1.pdf [file d0bm01987a1.pdf]

## Supporting Information

### **Drug-driven self-assembly of pH-sensitive nano-vesicles with high loading capacity and anti-tumor efficacy**

Yaomin Zhai<sup>#</sup>, Juan Wang<sup>#</sup>, Liyan Qiu<sup>\*</sup>

Ministry of Education (MOE), Key Laboratory of Macromolecular Synthesis and Functionalization, Department of Polymer Science and Engineering, Zhejiang University, Hangzhou 310027, China.

\* To whom correspondence should be addressed. E-mail: lyqiu@zju.edu.cn

<sup>#</sup> These authors contributed equally.

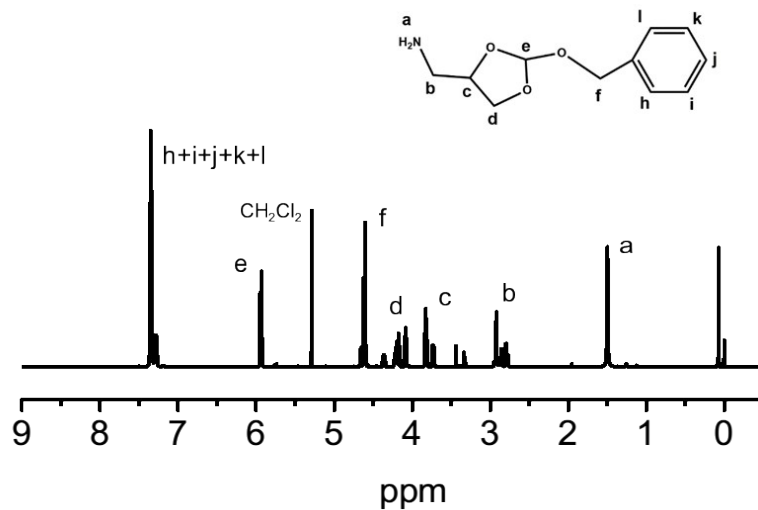

**Supplementary Fig. S1** The  $^1\text{H}$  NMR spectrum of ortho ester molecule (ABD).

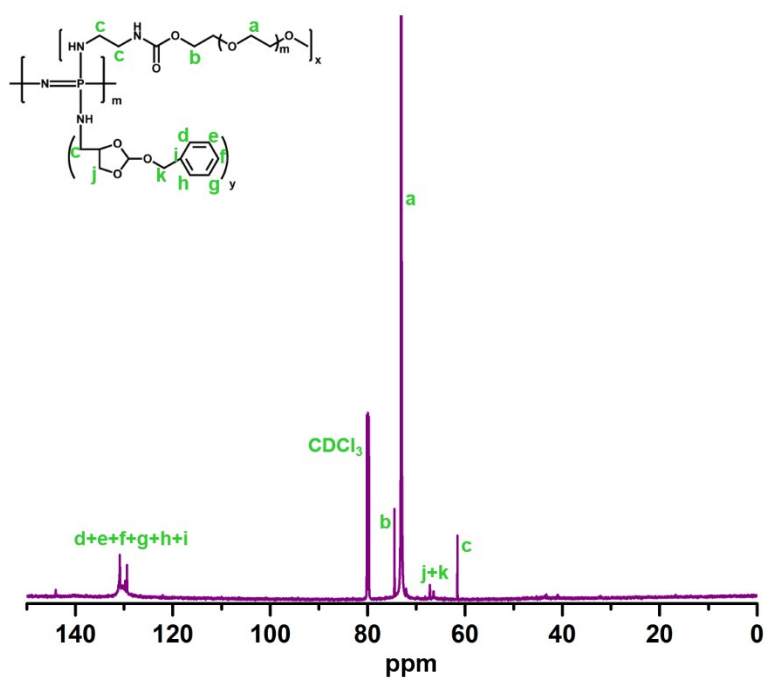

**Supplementary Fig. S2**  $^{13}\text{C}$  NMR spectrum of PAP-3 copolymer in deuterated chloroform.

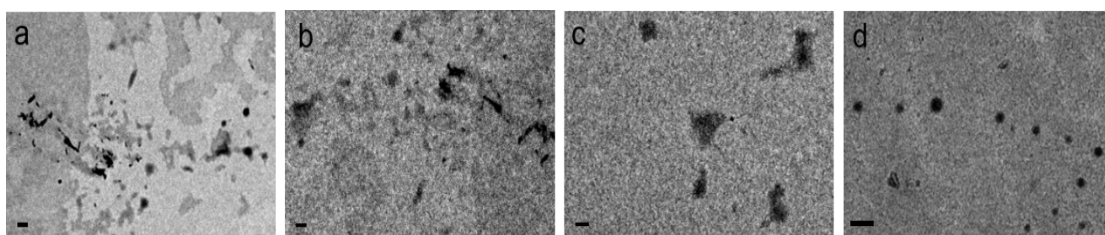

**Supplementary Fig. S3** TEM images of blank PAPs and DOX·HCl-loaded PAP-3. (a) PAP-1; (b) PAP-2; (c) PAP-3; (d) PAP-4. All scale bars are 0.2 μm.

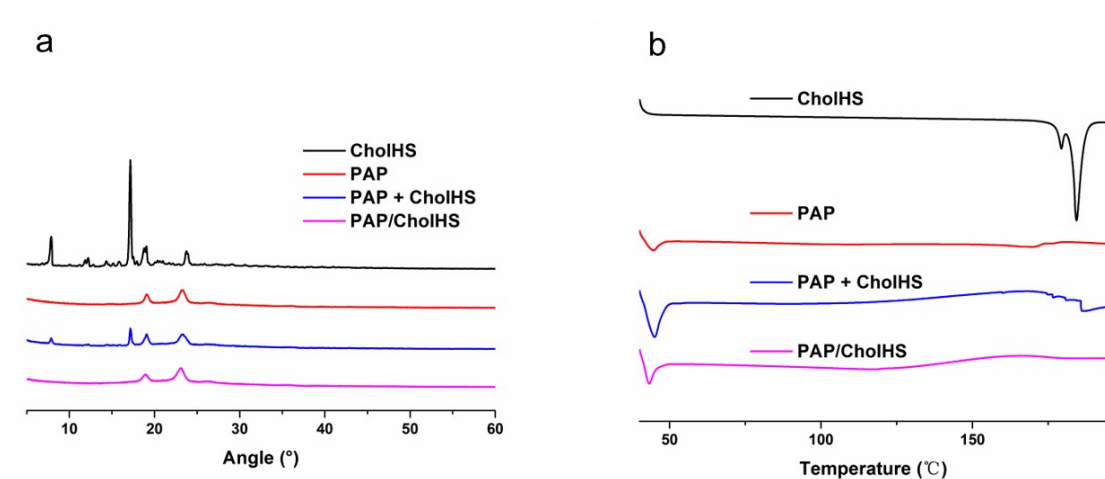

**Supplementary Fig. S4** Characterization of compatibility between PAP copolymer and CholHS. (a) XRD and (b) DSC patterns of PAP, CholHS, mixture of PAP and CholHS and PAP/CholHS.

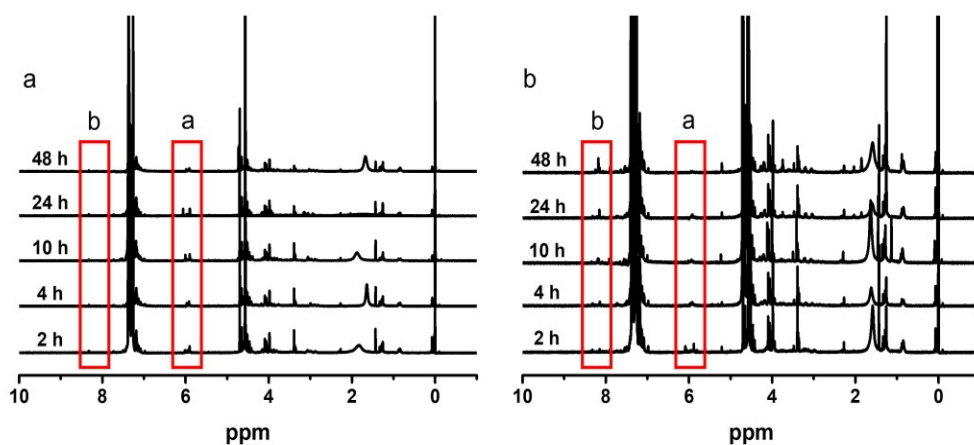

**Supplementary Fig. S5** Characterization of the hydrolysis performance of ABD molecules at (a) pH 7.4 and (b) pH 5.5.

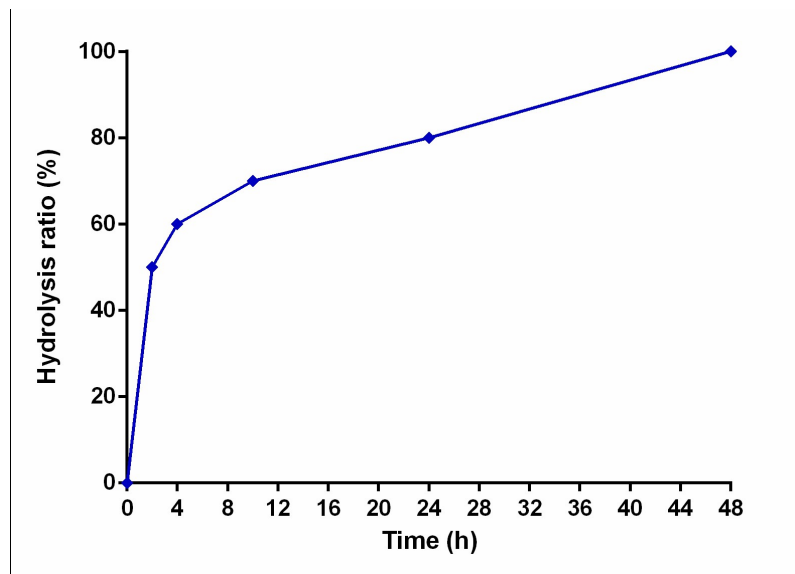

**Supplementary Fig. S6** The hydrolysis rate curve of ABD molecules at pH 5.5.

**Supplementary Table S1** Various properties of the DOX·HCl-loaded PAP vesicles containing different amounts of CholHS (DOX-PAP/CholHS).

| CholHS content<br>(wt%) | DOX·HCl-loaded PAP vesicles |      |              |              |
|-------------------------|-----------------------------|------|--------------|--------------|
|                         | Size (nm)                   | PDI  | EE (%)       | LC (%)       |
| 0                       | 156.7 ± 8.8                 | 0.38 | 98.33 ± 1.54 | 19.73 ± 0.24 |
| 5                       | 234.5 ± 7.5                 | 0.17 | 98.54 ± 1.43 | 19.77 ± 0.23 |
| 10                      | 240.5 ± 23.6                | 0.20 | 97.78 ± 1.66 | 19.64 ± 0.27 |
| 15                      | 307.3 ± 27.2                | 0.21 | 97.43 ± 1.75 | 19.59 ± 0.28 |
| 20                      | 320.7 ± 28.1                | 0.18 | 97.03 ± 1.41 | 19.52 ± 0.21 |
